# Supplementary material
Source: Research Square preprint supplement (doi:10.21203/rs.3.rs-9809667/v1)
Supplement: Supplementary file 1 [file 89ba9bc632b2fa5ac4287488.docx]

**Supplementary Information (SI)**


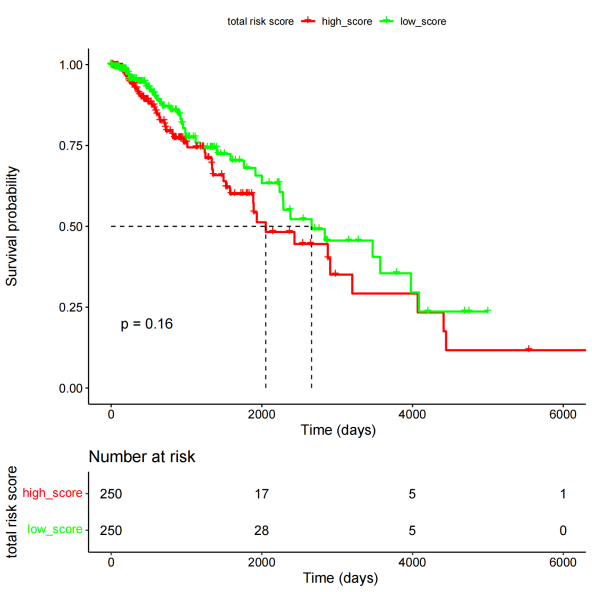


(**A**)


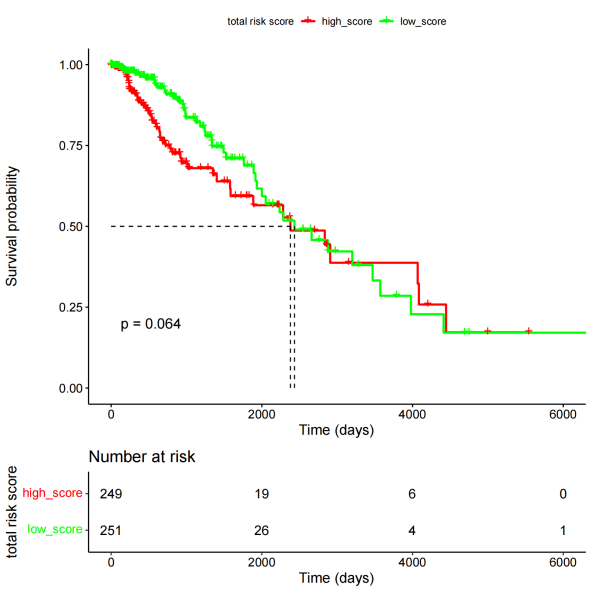


(**B**)


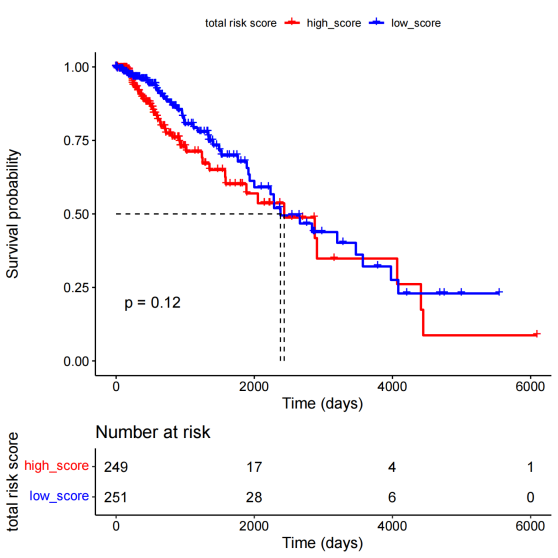


(**C**)

**Supplementary Figure S1**: Survival curves of the TCGA-LGG dataset (expression expressed as TPM number), none of (A) MGMT; (B) TERT; (C) MGMT+TERT, showed significant differences.


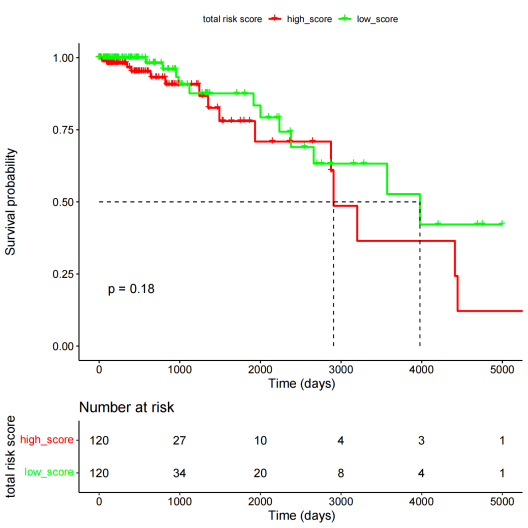


(**A**)


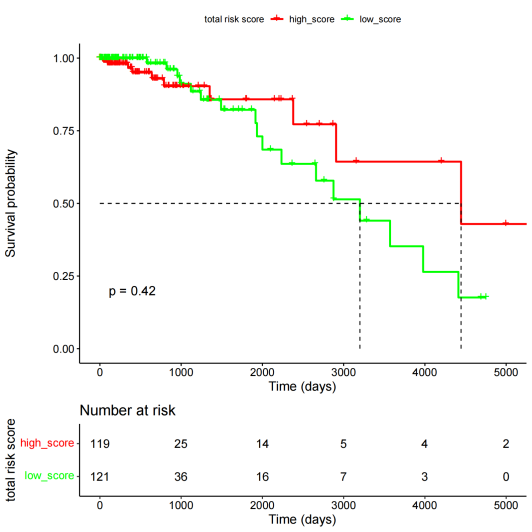


(**B**)


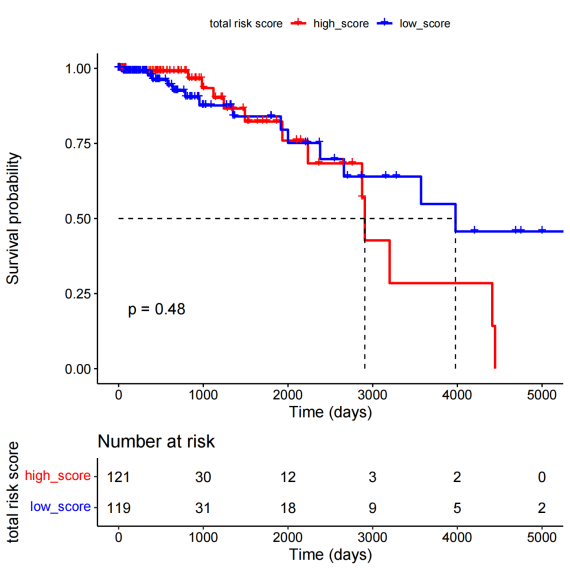


(**C**)

**Supplementary Figure S2**: Survival curves of grade II in the TCGA-LGG dataset (expression expressed as TPM number), (A) MGMT; (B) TERT; (C) MGMT+TERT, none of which showed significant differences.


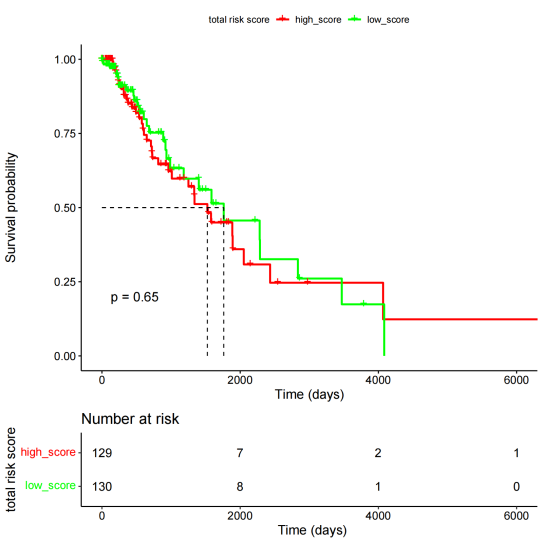


(**A**)


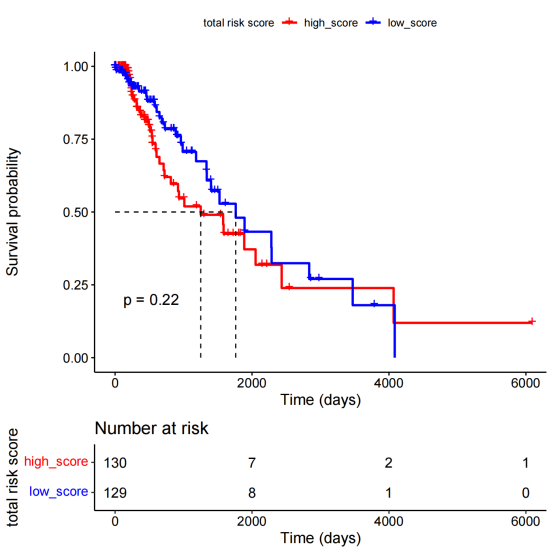


(**B**)

**Supplementary Figure S3**: Survival curves of TCGA-LGG dataset grade III (expression expressed as TPM number) (A) MGMT; (B) MGMT+TERT, neither of them shows significant difference.


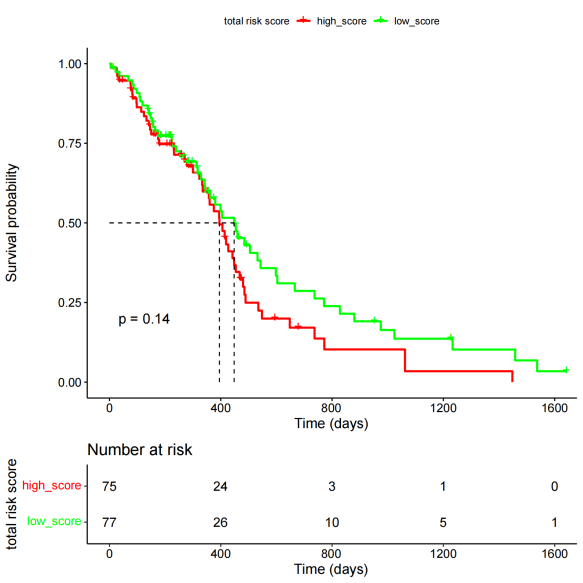


(**A**)


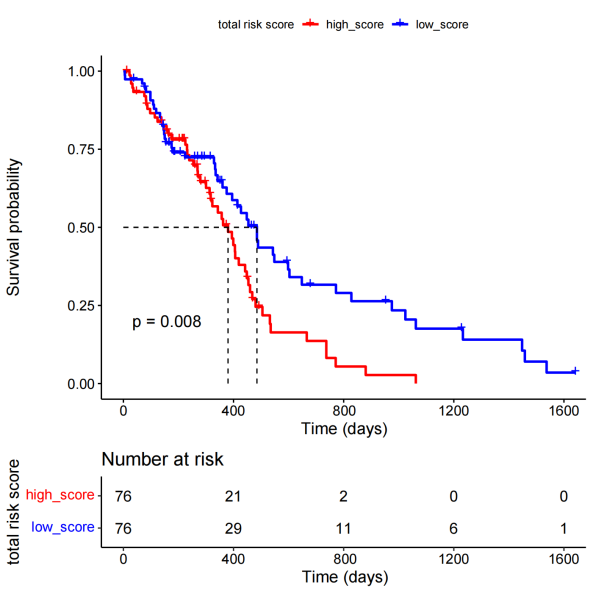


(**B**)

****Supplementary Figure S4****: Survival curves of the TCGA-GBM dataset (expression expressed as TPM number), (A) TERT not significant differences; (B)MGMT+TERT, both show significant differences, (expanded sample size). High MGMT expression was associated with shorter OS (Logrank p=0.00088, HR=1.5).


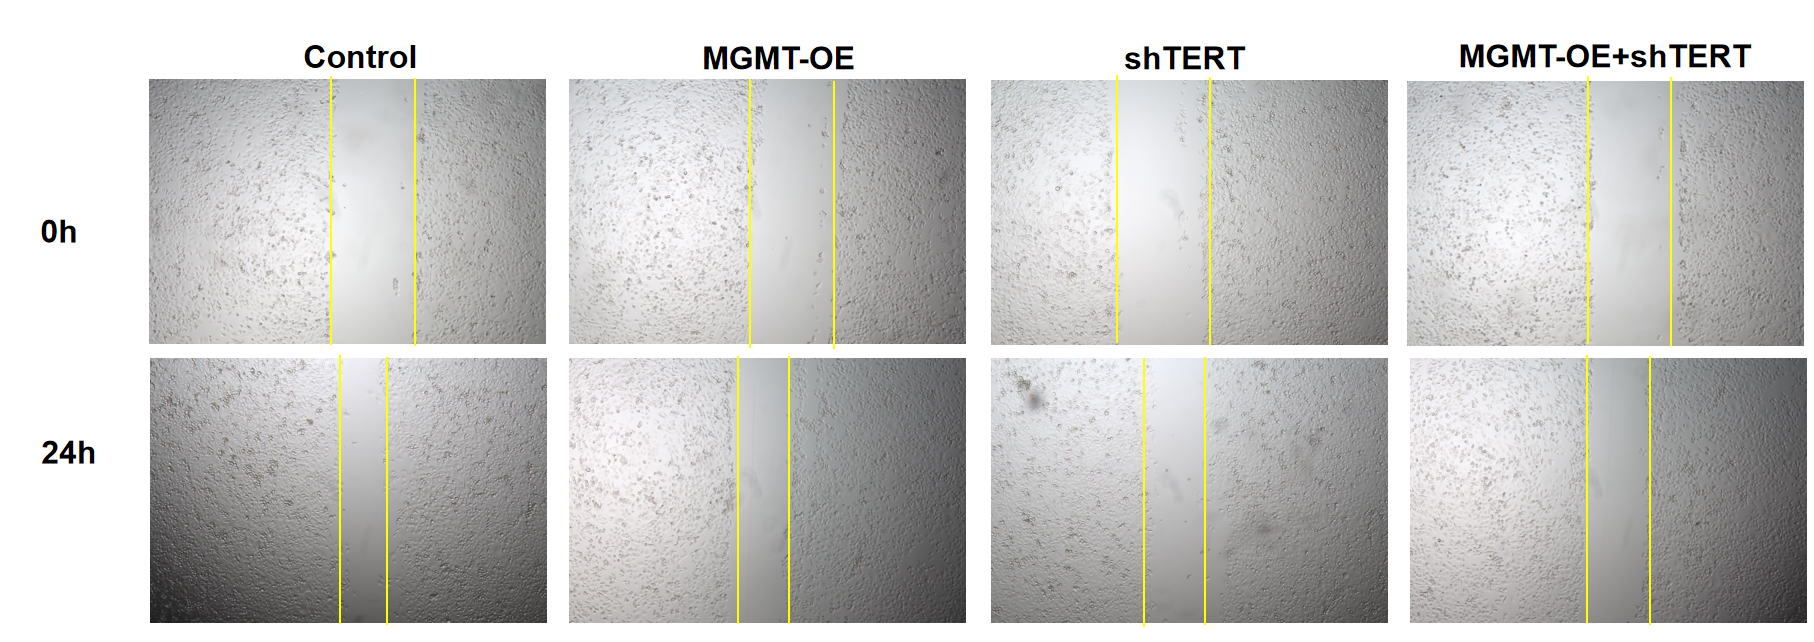


(A)


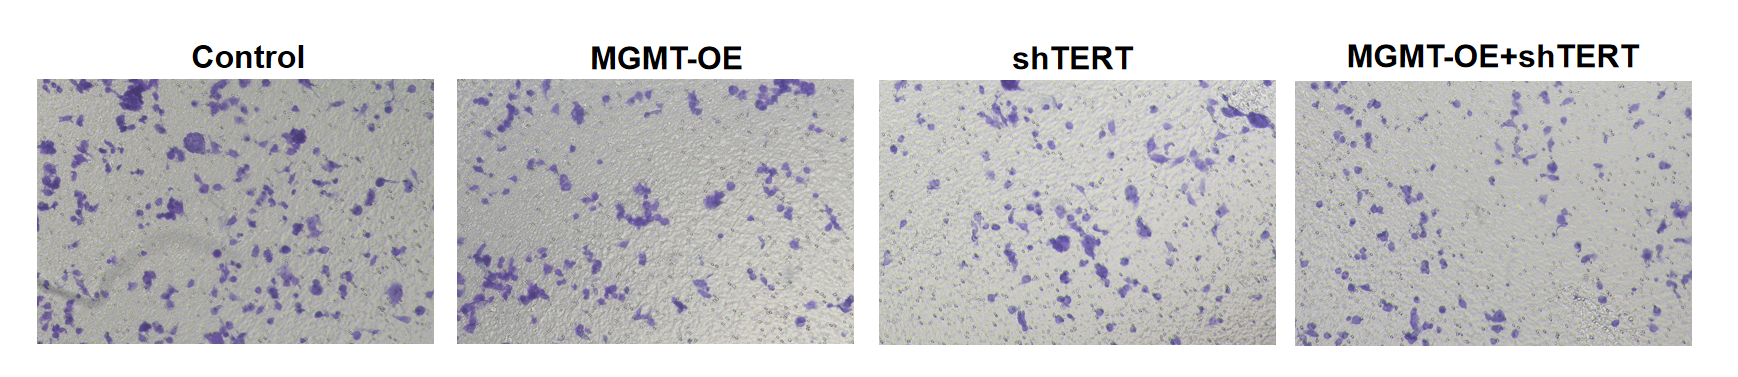


(B)

****Supplementary Figure S5. Functional effects of MGMT and TERT on glioma cell phenotypes.****(A) Representative images of wound healing assay at 0 h and 24 h post-scratch (B) Quantification of cell invasion assessed by Transwell assay.
